# Supplementary material for: The Novel Autophagy Inhibitor Alpha-Hederin Promoted Paclitaxel Cytotoxicity by Increasing Reactive Oxygen Species Accumulation in Non-Small Cell Lung Cancer Cells
Source: PubMed Central journal article supplement (PMC6214018; doi:10.3390/ijms19103221), 2018-10-18
Supplement: ijms-19-03221-s001.pdf [file ijms-19-03221-s001.pdf]

Additional file

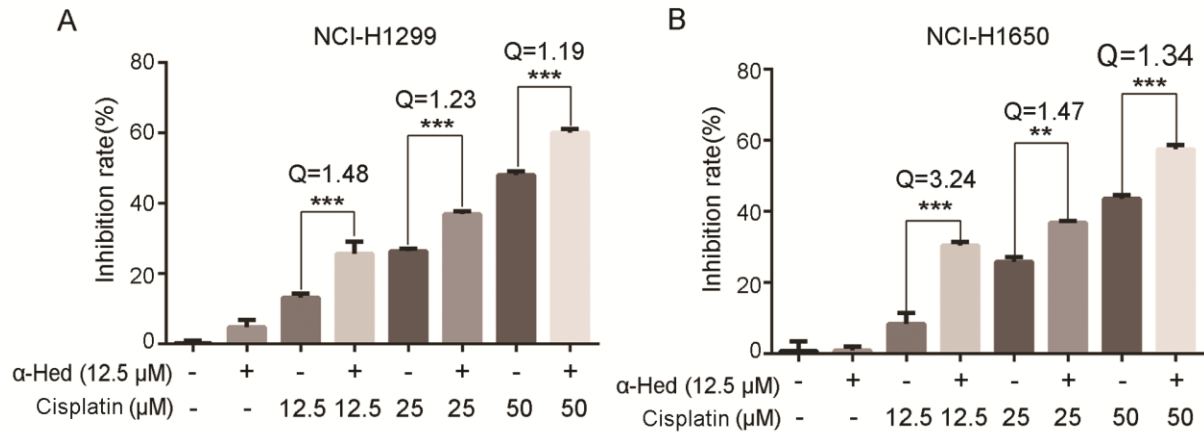

**$\alpha$ -Hed increased the cisplatin-induced inhibition of human NSCLC cell proliferation. (a and b)** NCI-H1650 (a) and NCI-H1299 (b) cells were treated with or without  $\alpha$ -Hed or Tax; 24 h later, the survival rate was detected using CCK-8. \*\*p < 0.01, \*\*\*p < 0.001. Q value > 1.15 indicates a synergistic effect.
